# Supplementary material for: Growth mechanism of 2D heterostructures of polypyrrole grown on TiO2 nanoribbons for high-performance supercapacitors
Source: Royal Society of Chemistry journal article supplement (doi:10.1039/d4na00121d), 2024-01-01
Supplement: d4na00121d1.pdf [file d4na00121d1.pdf]

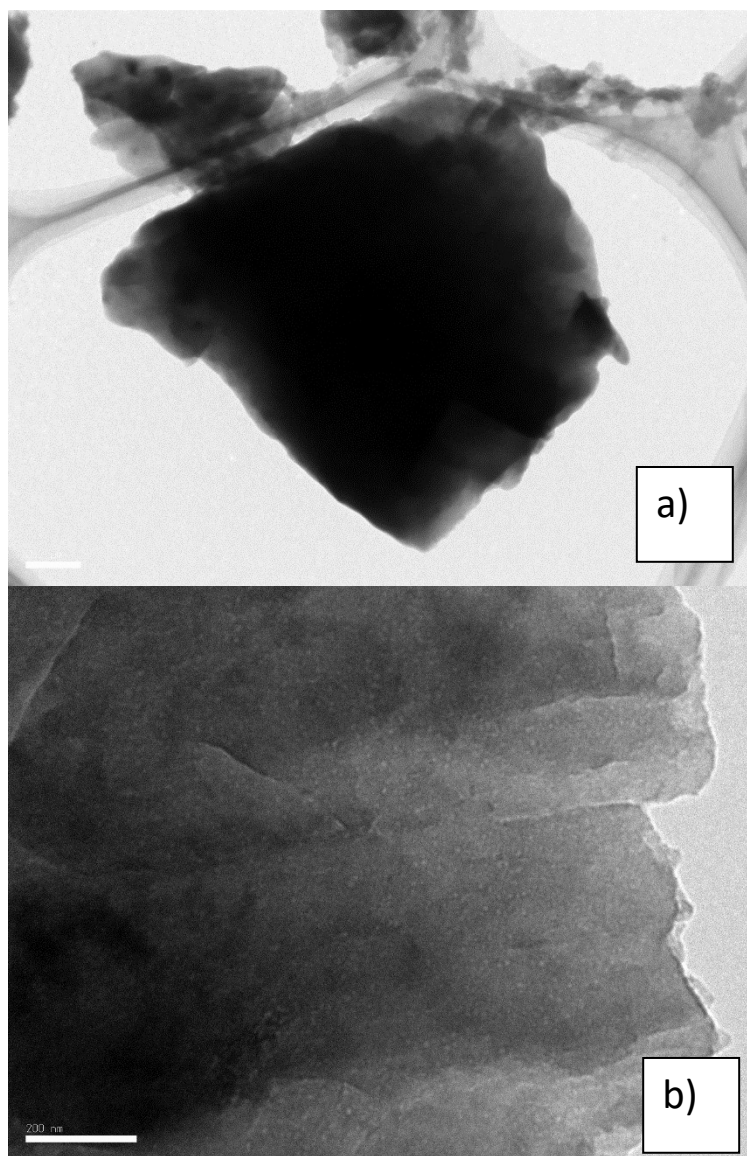

Figure S1: TEM image of 2D PPy/TiO<sub>2</sub>: Top view of 2D PPy on TiO<sub>2</sub> nanoribbon appeared in 2D layered structures. b) 2D PPy nanoribbon on the surface TiO<sub>2</sub> with clear arrangement for the layered structure on the margin.

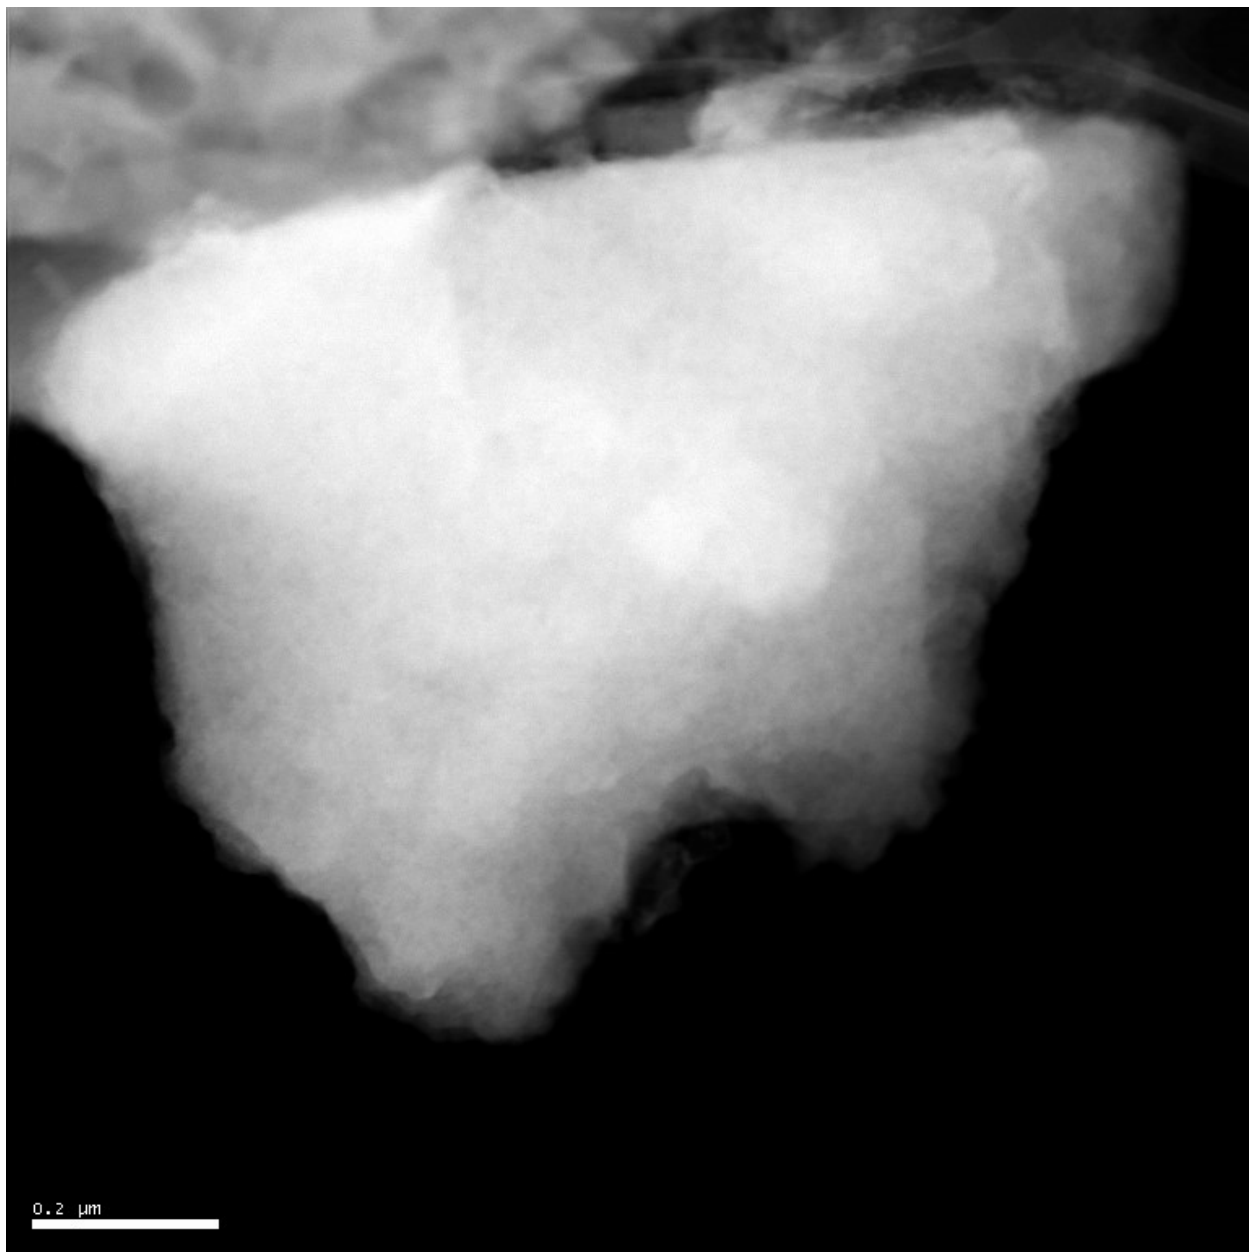

Figure S2: HAADF-STEM images of 2D PPy/TiO<sub>2</sub>

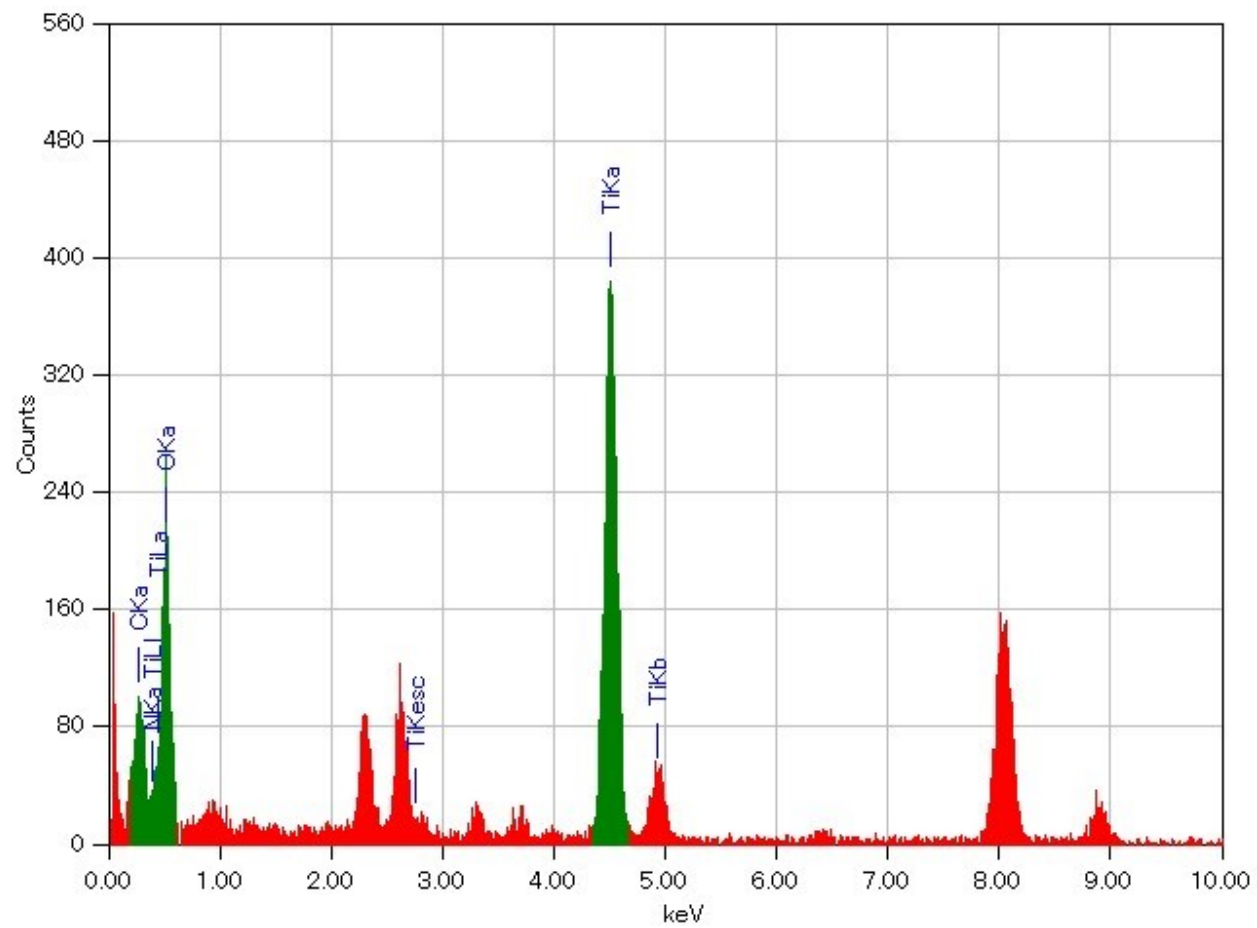

Figure S3: EDX spectra of 2D PPy/TiO<sub>2</sub>

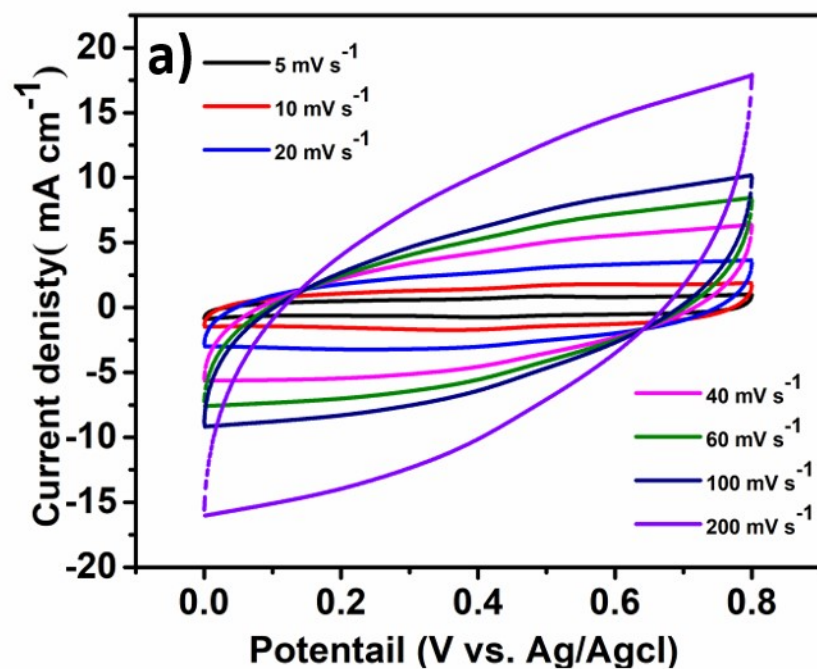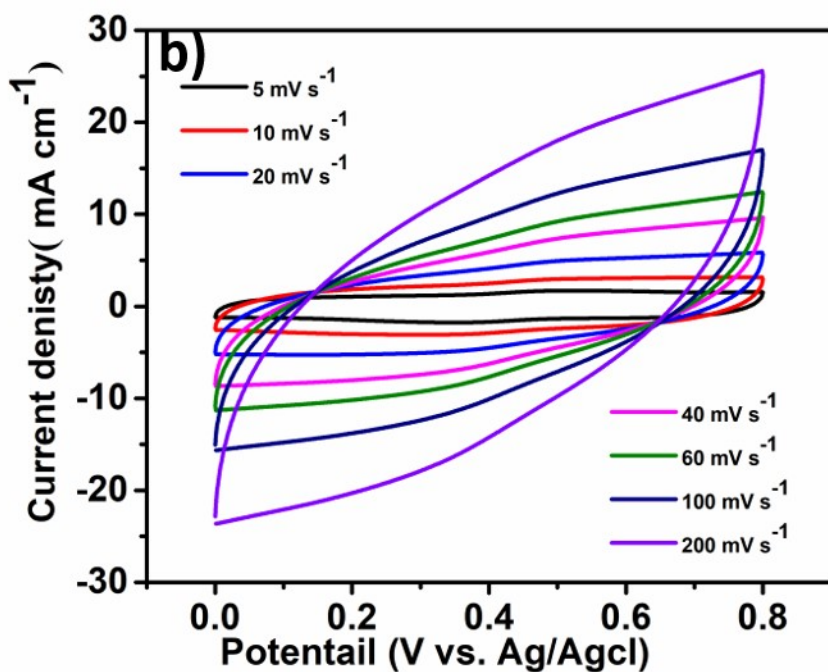

Fig S4: Cyclic voltammety graphs for a) 2D TiO<sub>2</sub>, b) 2DPpy/TiO<sub>2</sub>. at different scan rates

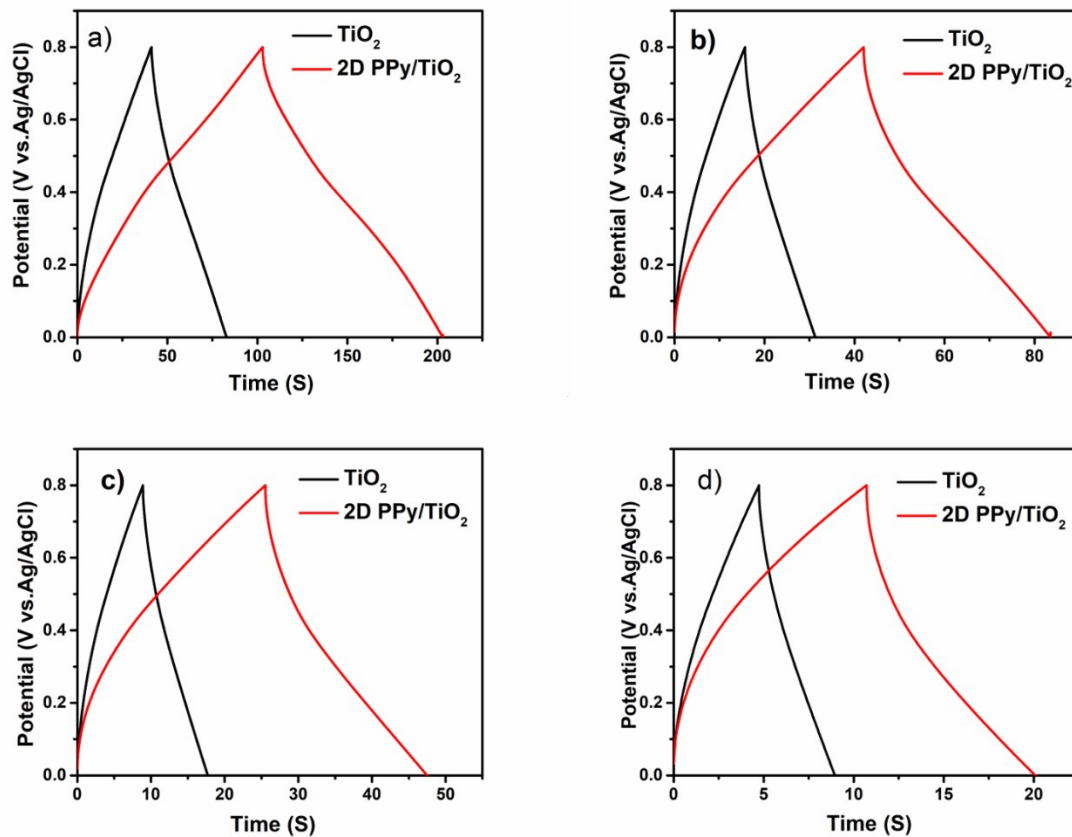

Figure S5: Galvanostatic charge-discharge curves at a current density of 2,4,8,10  $\text{A g}^{-1}$ , for pure  $2\text{DTiO}_2$  and  $2\text{D PPy}/\text{TiO}_2$ .

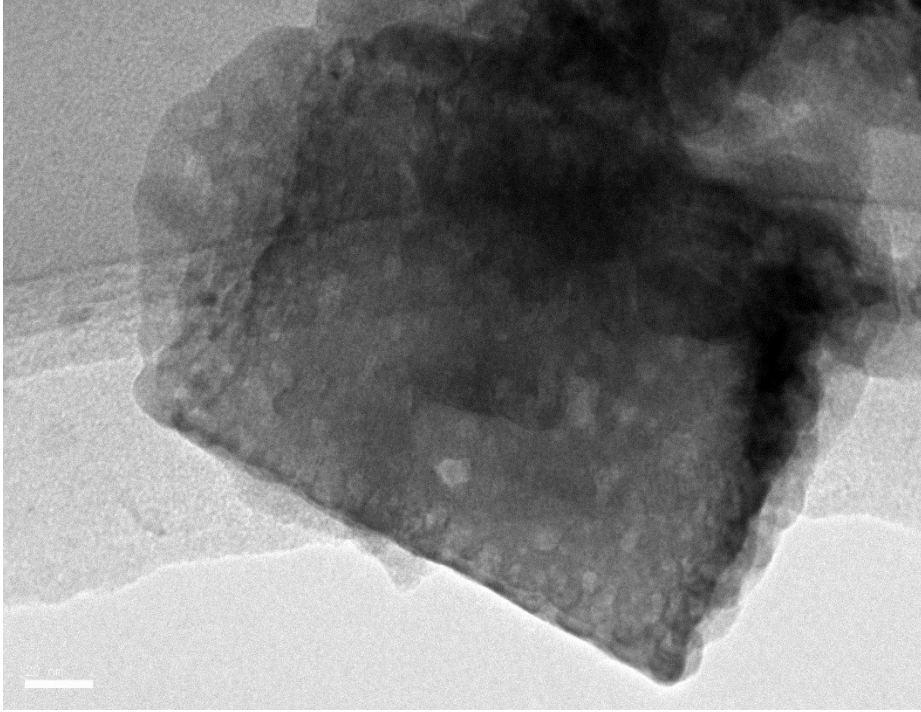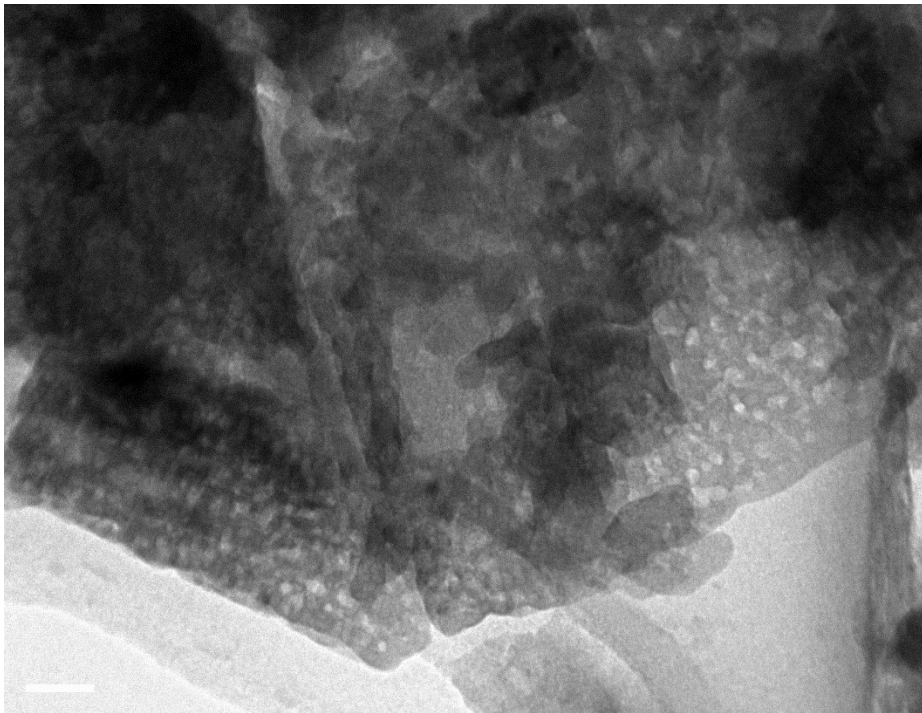

Figure S6: TEM images of 2D PPy/TiO<sub>2</sub> after 10.000 cycle test

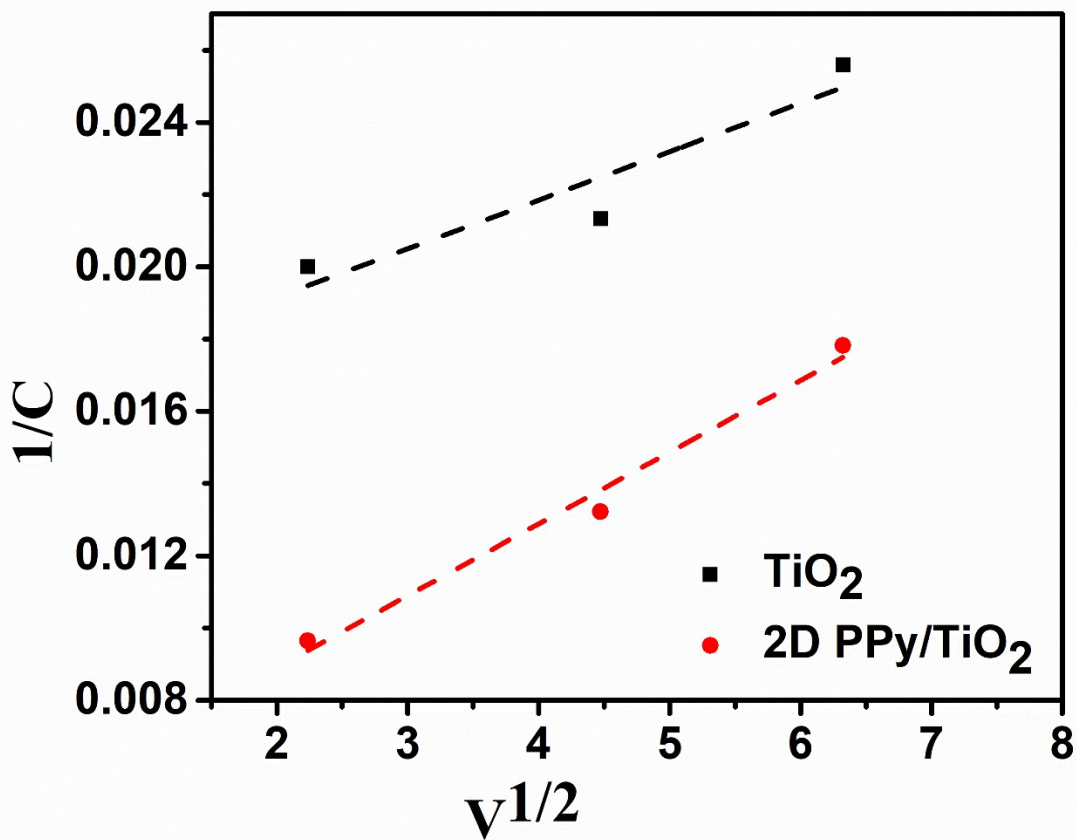

Figure S7: The linearly fitted line in the low scan rate region for calculation of total specific capacitance of the electrode material.

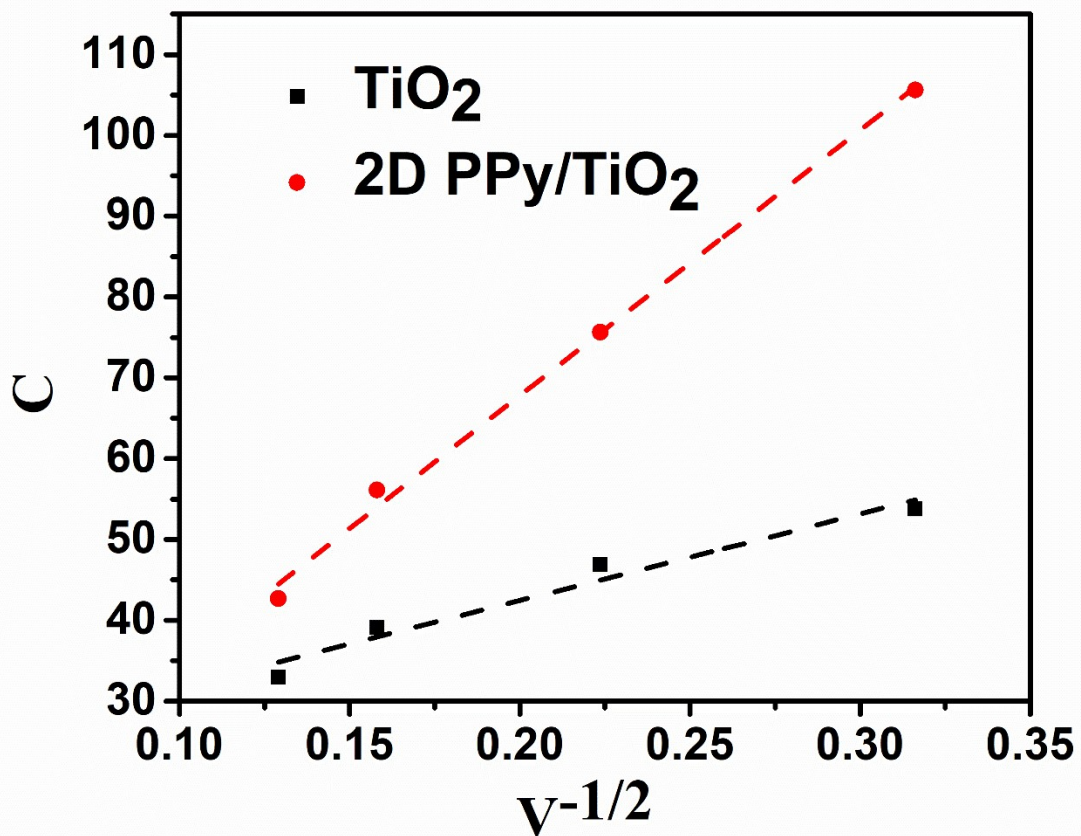

Figure S8: The linearly fitted line in the high scan rate region for calculation of electric double layer capacitance of the electrode material.
